# Supplementary material for: High power and low crest factor of direct-current triboelectric nanogenerator for self-powered optical computing system
Source: Royal Society of Chemistry journal article supplement (doi:10.1039/d3ee01930f), 2023-01-01
Supplement: d3ee01930f2.pdf [file d3ee01930f2.pdf]

## Additional Information

# Achieving High Power and Low Crest Factor of Direct-Current Triboelectric Nanogenerator for Self-Powered Optical Computing System

Hongyun Li,<sup>†a</sup> Shaobo Lv,<sup>†a</sup> Binbin Zhang,<sup>b</sup> Bochao Liu,<sup>c</sup> Jin Yang,<sup>c</sup> Hengyu Guo,<sup>c</sup> Yiyuan Xie,<sup>\*a</sup> and Zhiming Lin<sup>\*a</sup>

- a. *School of Electronics and Information Engineering, Southwest University, Chongqing 400715, P. R. China.*
- b. *Department of Biomedical Engineering, City University of Hong Kong, Hong Kong, China.*
- c. *Department of Optoelectronic Engineering, Key Laboratory of Optoelectronic Technology and Systems, Ministry of Education, Chongqing University, Chongqing 400044, P. R. China.*

<sup>†</sup> These authors contributed equally to this work.

\* Correspondence: zhiminglin@swu.edu.cn

‡ Electronic Supplementary Information (ESI) available

See DOI: 10.1039/x0xx00000x

## Additional Figure

**Figure A1** | A comparison of the crest factor and average power density of the proposed D-TENG with other DC-TENGs.

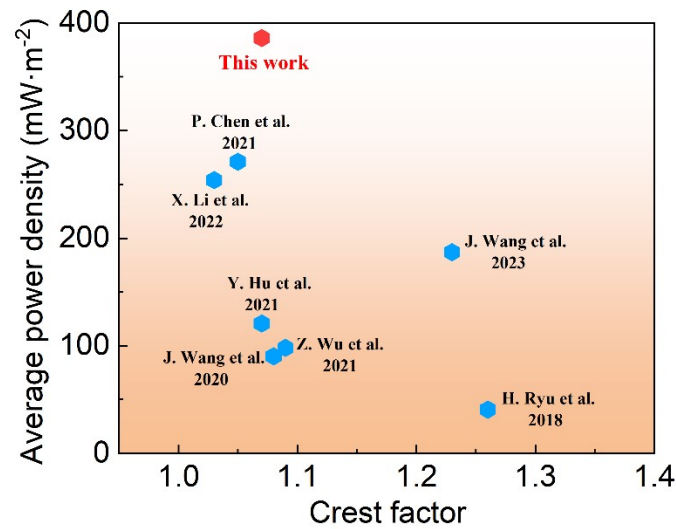

Figure A1 presents the performance comparison of crest factor and average power density among all the presented data in recent reported works about direct-current triboelectric nanogenerators relying on phase shift principle. Among them, **our D-TENG not only shows a very low crest factor that can maintain a constant current output, but also achieves an excellent high-power generation (achieving an increase of 42.4% compared with the work by P. Chen et al. [ref. 7])** as sustainable and stable power source, demonstrating the potential for directly powering electronics and benefiting the future development of the IoTs. Hence, compared with various existing phase shift based DC-TENGs, our work exhibits a unique advantage in DC-TENG performance with ultrahigh and stable output. And the specific parameters of the related works are also listed in the following Table.

Such related works have been supplemented in Supplementary Information, and added the corresponding descriptions in Manuscript.

## Additional Table

**Table A1.** The performance of DC-TENG in this work compared with others based on phase shift design.

| Structure                                                                           | Size                    | Rotation speed (rpm) | Crest factor | Average power density                  | Reference        |
|-------------------------------------------------------------------------------------|-------------------------|----------------------|--------------|----------------------------------------|------------------|
|    | 508.7 cm <sup>3</sup>   | 480                  | 1.31         | 4.4<br>(W·m <sup>-3</sup> )            | 1                |
|    | 78.5 cm <sup>2</sup>    | 918                  | 1.26         | 40.6<br>(mW·m <sup>-2</sup> )          | 2                |
|    | 490.86 cm <sup>2</sup>  | 300                  | 1.23         | 187.02<br>(mW·m <sup>-2</sup> )        | 3                |
|    | 19.6 cm <sup>2</sup>    | 750                  | 1.09         | 98<br>(mW·m <sup>-2</sup> )            | 4                |
|   | 226.0 cm <sup>2</sup>   | 600                  | 1.08         | 90.27<br>(mW·m <sup>-2</sup> )         | 5                |
|  | 911.035 cm <sup>2</sup> | 240                  | 1.07         | 120.74<br>(mW·m <sup>-2</sup> )        | 6                |
|  | 113.04 cm <sup>2</sup>  | 300                  | 1.05         | 271<br>(mW·m <sup>-2</sup> )           | 7                |
|  | 1496.23 cm <sup>3</sup> | 500                  | 1.05         | 10<br>(W·m <sup>-3</sup> )             | 8                |
|  | 706.5 cm <sup>2</sup>   | 480                  | 1.03         | 254<br>(mW·m <sup>-2</sup> )           | 9                |
|  | 268.96 cm <sup>2</sup>  | 560                  | <b>1.07</b>  | <b>385.93</b><br>(mW·m <sup>-2</sup> ) | <b>This work</b> |

## References

1. X. Li, X. Yin, Z. Zhao, L. Zhou, D. Liu, C. Zhang, C. Zhang, W. Zhang, S. Li, J. Wang and Z. L. Wang, *Advanced Energy Materials*, 2020, **10**.
2. H. Ryu, J. H. Lee, U. Khan, S. S. Kwak, R. Hinchet and S.-W. Kim, *Energy & Environmental Science*, 2018, **11**, 2057-2063.
3. J. Wang, H. Li, D. Zhao, Q. Gao, X. Cheng, J. Wen, Z. L. Wang and T. Cheng, *Advanced Materials Technologies*, 2023, DOI: 10.1002/admt.202300480.
4. Z. Wu, S. Wang, Z. Cao, R. Ding and X. Ye, *Nano Energy*, 2021, **83**.
5. J. Wang, Y. Li, Z. Xie, Y. Xu, J. Zhou, T. Cheng, H. Zhao and Z. L. Wang, *Advanced Energy Materials*, 2020, **10**.
6. Y. Hu, X. Li, Z. Zhao, C. Zhang, L. Zhou, Y. Li, Y. Liu, J. Wang and Z. L. Wang, *Small Methods*, 2021, **5**, e2100936.
7. P. Chen, J. An, R. Cheng, S. Shu, A. Berbille, T. Jiang and Z. L. Wang, *Energy & Environmental Science*, 2021, **14**, 4523-4532.
8. M. Li, T. Jiang, Y. Ren and H. Jiang, *Nano Energy*, 2022, **103**.
9. X. Li, C. Zhang, Y. Gao, Z. Zhao, Y. Hu, O. Yang, L. Liu, L. Zhou, J. Wang and Z. L. Wang, *Energy & Environmental Science*, 2022, **15**, 1334-1345.
